# Supplementary material for: Genetic and Proteomic Evidence for Roles of Drosophila SUMO in Cell Cycle Control, Ras Signaling, and Early Pattern Formation
Source: PLoS One. 2009 Jun 16;4(6):e5905. doi: 10.1371/journal.pone.0005905 (PMC2692000; doi:10.1371/journal.pone.0005905)
Supplement: Table S6 — Comparison on the levels of enrichment in Biological Processes of the 2h AEL embryos proteome to that of the SUMO conjugates identified in two-step purification (0.03 MB XLS) [file pone.0005905.s006.xls]

## Sheet: Table S6
Table S6. Comparison on the levels of enrichment in Biological Processes of the 2h AEL embryos proteome to that of the SUMO conjugates identified in two-step purification.
GO Term	GO ID	# 2h E	% 2h E	# 2step	%2step	HypGeoM*
reproduction	GO:0000003	193	0.0792	41	0.2929	5.82747e-15
primary metabolic process	GO:0044238	1103	0.4528	104	0.7429	5.2031e-13
cell differentiation	GO:0030154	307	0.126	46	0.3286	6.24651e-11
cell cycle	GO:0007049	241	0.0989	39	0.2786	2.72403e-10
metabolic process	GO:0008152	1312	0.5386	108	0.7714	2.64001e-09
regulation of biological process	GO:0050789	434	0.1782	52	0.3714	1.09876e-08
protein metabolic process	GO:0019538	615	0.2525	65	0.4643	1.14331e-08
cytoplasm organization	GO:0007028	25	0.0103	11	0.0786	3.19547e-08
multicellular organismal development	GO:0007275	435	0.1786	49	0.35	2.65842e-07
biosynthetic process	GO:0009058	387	0.1589	45	0.3214	3.95517e-07
anatomical structure morphogenesis	GO:0009653	311	0.1277	39	0.2786	4.27551e-07
nucleobase, nucleoside, nucleotide and nucleic acid metabolic process	GO:0006139	429	0.1761	47	0.3357	1.18332e-06
embryonic development	GO:0009790	100	0.0411	19	0.1357	1.54255e-06
translation	GO:0006412	222	0.0911	30	0.2143	2.5785e-06
behavior	GO:0007610	57	0.0234	13	0.0929	9.72446e-06
cellular component organization	GO:0016043	710	0.2915	60	0.4286	0.000127368
transcription	GO:0006350	150	0.0616	19	0.1357	0.000439335
protein modification process	GO:0006464	200	0.0821	23	0.1643	0.000447623
response to abiotic stimulus	GO:0009628	45	0.0185	9	0.0643	0.000632365
cell communication	GO:0007154	251	0.103	25	0.1786	0.00187043
signal transduction	GO:0007165	189	0.0776	20	0.1429	0.00260365
response to stress	GO:0006950	95	0.039	12	0.0857	0.00459114
DNA metabolic process	GO:0006259	77	0.0316	10	0.0714	0.00748985
death	GO:0016265	56	0.023	8	0.0571	0.00927995
cell death	GO:0008219	56	0.023	8	0.0571	0.00927995
regulation of gene expression, epigenetic	GO:0040029	35	0.0144	6	0.0429	0.0100907
cell proliferation	GO:0008283	57	0.0234	8	0.0571	0.0101963
cell recognition	GO:0008037	19	0.0078	4	0.0286	0.0170804
organelle organization	GO:0006996	386	0.1585	29	0.2071	0.0251356
catabolic process	GO:0009056	155	0.0636	14	0.1	0.027898
transport	GO:0006810	412	0.1691	30	0.2143	0.0307937
carbohydrate metabolic process	GO:0005975	89	0.0365	9	0.0643	0.0371399
response to endogenous stimulus	GO:0009719	7	0.0029	2	0.0143	0.051444
cytoskeleton organization	GO:0007010	69	0.0283	7	0.05	0.0563022
generation of precursor metabolites and energy	GO:0006091	89	0.0365	8	0.0571	0.0692778
cell-cell signaling	GO:0007267	74	0.0304	7	0.05	0.0703123
response to biotic stimulus	GO:0009607	25	0.0103	3	0.0214	0.118859
cellular amino acid and derivative metabolic process	GO:0006519	75	0.0308	6	0.0429	0.123445
response to external stimulus	GO:0009605	27	0.0111	3	0.0214	0.134464
protein transport	GO:0015031	125	0.0513	6	0.0429	0.150033
lipid metabolic process	GO:0006629	61	0.025	2	0.0143	0.183733
ion transport	GO:0006811	55	0.0226	4	0.0286	0.183937
cellular homeostasis	GO:0019725	45	0.0185	2	0.0143	0.258111
growth	GO:0040007	40	0.0164	2	0.0143	0.273647
*Hypergeometric mean was calculated to evaluate the level of enrichment of a GO category in SUMO conjugates as a comparison to 2436 annotated proteins found in 2h AEL embryos.
